# Supplementary material
Source: PubMed Central journal article supplement (PMC8390898)
Supplement: mmc1.pdf [file mmc1.pdf]

**Biophysical Journal, Volume 120**

**Supplemental information**

**Physical phenotype of blood cells is altered in COVID-19**

**Markéta Kubánková, Bettina Hohberger, Jakob Hoffmanns, Julia Fürst, Martin Herrmann, Jochen Guck, and Martin Kräter**

## Physical phenotype of blood cells is altered in COVID-19

M Kubánková, B Hohberger, J Hoffmanns, J Fürst, M Herrmann, J Guck<sup>#</sup>, M Kräter

<sup>#</sup> corresponding author

1

### Supplementary Figures and Tables

**Supplementary table 1.** Patient characteristics, medical management and outcome of all donors included in this study.

|                                                  | All donors n=54 (100%)    |                     |                   |
|--------------------------------------------------|---------------------------|---------------------|-------------------|
|                                                  | Control n=24              | Recovered n=14      | COVID-19 n=17     |
| <b>Age (years): median (range)</b>               | 62.5 ± 13.6 years (26-81) | 58.6 ± 12.4 (27-76) | 68 ± 10.4 (41-87) |
| <b>Gender</b>                                    |                           |                     |                   |
| male                                             | 12 (50%)                  | 10 (71.4%)          | 13 (76.5%)        |
| female                                           | 12 (50%)                  | 4 (18.6%)           | 4 (23.5%)         |
| <b>Primary virus identification (PCR airway)</b> | n.a.                      | 14 (100%)           | 17 (100%)         |
| <b>Complications and medical management</b>      |                           |                     |                   |
| Oxygen supplementation                           | 0                         | 0                   | 17 (100%)         |
| Mechanical ventilation                           | 0                         | 0                   | 13 (76.5%)        |
| ECMO                                             | 0                         | 0                   | 6 (35.3%)         |
| Dialysis                                         | 0                         | 0                   | 3 (17.6%)         |
| Systemic Superinfection                          | 0                         | 0                   | 7 (41.1%)         |
| Pulmonary embolism                               | 0                         | 0                   | 6 (35.3%)         |
| <b>Drugs</b>                                     |                           |                     |                   |
| Azithromycin                                     | 0                         | 0                   | 3 (17.6%)         |
| Hydroxychloroquine                               | 0                         | 0                   | 9 (52.9%)         |
| Heparin prophylactic/therapeutic anticoagulation | 0                         | 0                   | 13 (76.5%)        |
| <b>Outcome</b>                                   |                           |                     |                   |
| Length of hospital stay (days)                   | 0                         | 7 ± 2.4 (5-12)      | 22.8 ± 14 (7-50)  |
| Intensive care unit stay                         | 0                         | 0                   | 13 (76.5%)        |
| Discharged                                       | 0                         | 14 (100%)           | 9 (52.9%)         |
| Further hospitalized                             | 0                         | 0                   | 0                 |
| Death                                            | 0                         | 0                   | 8 (47.1%)         |

2 **Supplementary table 2.** Kruskal-Wallis  $H$ -statistics,  $p$ -values and effect sizes  $\epsilon^2$ . The last three columns  
 3 represent  $p$ -values from Dunn's posthoc tests conducted for the significant results of Kruskal-Wallis  $H$ -  
 4 tests.

| A - healthy<br>B- recovered<br>C - COVID | $p$ (Kruskal-<br>Wallis) | $H$ (Kruskal-<br>Wallis) | $\epsilon^2$ (Kruskal-<br>Wallis) | $p$ AC<br>(Dunn's) | $p$ AB<br>(Dunn's) | $p$ BC<br>(Dunn's) |
|------------------------------------------|--------------------------|--------------------------|-----------------------------------|--------------------|--------------------|--------------------|
| <b>Erythrocytes</b>                      |                          |                          |                                   |                    |                    |                    |
| Median area                              | 0.1162                   | 4.30                     | 0.080                             | 0.4896             | 0.1503             | 1.0000             |
| SD area                                  | 0.0000                   | 26.99                    | 0.500                             | 0.0000             | 0.2259             | 0.0112             |
| Median volume                            | 0.2532                   | 2.75                     | 0.051                             | 1.0000             | 0.2938             | 1.0000             |
| SD volume                                | 0.0000                   | 33.75                    | 0.625                             | 0.0000             | 0.9204             | 0.0002             |
| Median deformation                       | 0.2180                   | 3.05                     | 0.056                             | 0.4480             | 1.0000             | 0.3380             |
| SD deformation                           | 0.0000                   | 42.30                    | 0.783                             | 0.0000             | 0.0024             | 0.0340             |
| % of ery with def < 0.28                 | 0.0000                   | 25.83                    | 0.478                             | 0.0000             | 1.0000             | 0.0016             |
| <b>Neutrophils</b>                       |                          |                          |                                   |                    |                    |                    |
| Median area                              | 0.0000                   | 22.95                    | 0.425                             | 0.0000             | 0.2704             | 0.0260             |
| SD area                                  | 0.0001                   | 18.86                    | 0.349                             | 0.0023             | 0.0001             | 0.6791             |
| Median volume                            | 0.0000                   | 23.53                    | 0.436                             | 0.0000             | 0.1319             | 0.0517             |
| SD volume                                | 0.0001                   | 19.78                    | 0.366                             | 0.0005             | 0.0002             | 1.0000             |
| Median deformation                       | 0.0013                   | 13.31                    | 0.246                             | 0.0021             | 1.0000             | 0.0319             |
| SD deformation                           | 0.0059                   | 10.28                    | 0.190                             | 0.0041             | 0.3772             | 0.5059             |
| Median Young's modulus                   | 0.1698                   | 3.55                     | 0.066                             | 0.1827             | 1.0000             | 0.8807             |
| <b>Lymphocytes</b>                       |                          |                          |                                   |                    |                    |                    |
| Median area                              | 0.0499                   | 6.00                     | 0.111                             | 0.1667             | 1.0000             | 0.0939             |
| SD area                                  | 0.0000                   | 30.78                    | 0.570                             | 0.2270             | 0.0010             | 0.0000             |
| Median volume                            | 0.0814                   | 5.02                     | 0.093                             | 0.3403             | 1.0000             | 0.1134             |
| SD volume                                | 0.0000                   | 28.36                    | 0.525                             | 0.7403             | 0.0003             | 0.0000             |
| Median deformation                       | 0.0132                   | 8.66                     | 0.160                             | 0.0107             | 0.1945             | 1.0000             |
| SD deformation                           | 0.0000                   | 35.61                    | 0.659                             | 0.0043             | 0.0218             | 0.0000             |
| Median Young's modulus                   | 0.0029                   | 11.68                    | 0.216                             | 0.0029             | 0.0542             | 1.0000             |
| <b>Monocytes</b>                         |                          |                          |                                   |                    |                    |                    |
| Median area                              | 0.0000                   | 30.64                    | 0.567                             | 0.0000             | 0.0001             | 1.0000             |
| SD area                                  | 0.0011                   | 13.65                    | 0.253                             | 0.0007             | 0.0892             | 0.7682             |
| Median volume                            | 0.0000                   | 27.71                    | 0.513                             | 0.0000             | 0.0001             | 1.0000             |
| SD volume                                | 0.0001                   | 18.48                    | 0.342                             | 0.0001             | 0.0075             | 1.0000             |
| Median deformation                       | 0.7918                   | 0.47                     | 0.009                             | 1.0000             | 1.0000             | 1.0000             |
| SD deformation                           | 0.4949                   | 1.41                     | 0.026                             | 0.7256             | 1.0000             | 1.0000             |
| Median Young's modulus                   | 0.7763                   | 0.51                     | 0.009                             | 1.0000             | 1.0000             | 1.0000             |
| <b>Eosinophils</b>                       |                          |                          |                                   |                    |                    |                    |
| Median area                              | 0.1289                   | 4.10                     | 0.076                             | 0.6099             | 0.1547             | 1.0000             |
| SD area                                  | 0.0126                   | 8.7600                   | 0.162                             | 0.1245             | 0.0168             | 1.0000             |
| Median volume                            | 0.2532                   | 2.75                     | 0.051                             | 1.0000             | 0.2938             | 1.0000             |
| SD volume                                | 0.0000                   | 33.75                    | 0.625                             | 0.0000             | 0.9204             | 0.0002             |
| Median deformation                       | 0.4143                   | 1.76                     | 0.033                             | 1.0000             | 0.9095             | 0.5981             |
| SD deformation                           | 0.5965                   | 1.03                     | 0.019                             | 1.0000             | 1.0000             | 0.9290             |
| Median Young's modulus                   | 0.9592                   | 0.08                     | 0.002                             | 1.0000             | 1.0000             | 1.0000             |
| <b>% of WBC</b>                          |                          |                          |                                   |                    |                    |                    |
| % neutrophils                            | 0.0105                   | 9.10                     | 0.169                             | 0.0499             | 1.0000             | 0.0174             |
| % lymphocytes                            | 0.0007                   | 14.63                    | 0.271                             | 0.0006             | 0.2426             | 0.0328             |
| % monocytes                              | 0.0151                   | 8.38                     | 0.155                             | 0.0244             | 1.0000             | 0.0644             |
| % eosinophils                            | 0.0010                   | 13.73                    | 0.254                             | 0.1576             | 0.0007             | 0.1970             |
| NLR                                      | 0.0022                   | 12.22                    | 0.226                             | 0.0031             | 0.7018             | 0.0252             |

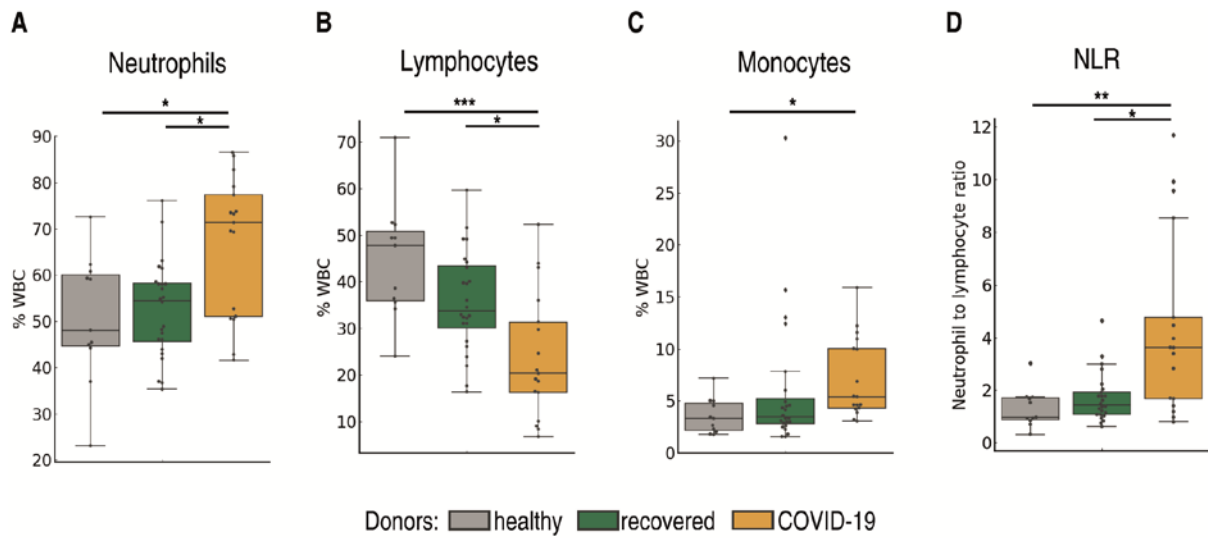

5

6 **Supplementary figure 1. Proportions of white blood cells calculated from real-time deformability**  
 7 **cytometry (RT-DC) data.** The percentage of A) neutrophils, B) lymphocytes and C) monocytes in the  
 8 total white blood cell count; a comparison of the control blood donor cohort (grey), recovered patients  
 9 (green) and hospitalized COVID-19 patients (yellow). D) The neutrophil to lymphocyte ratio is  
 10 significantly higher in hospitalized patients compared to the recovered and healthy donor cohorts, \*  $p$   
 11  $< .05$ , \*\*  $p < .01$ , \*\*\*  $p < .001$ .

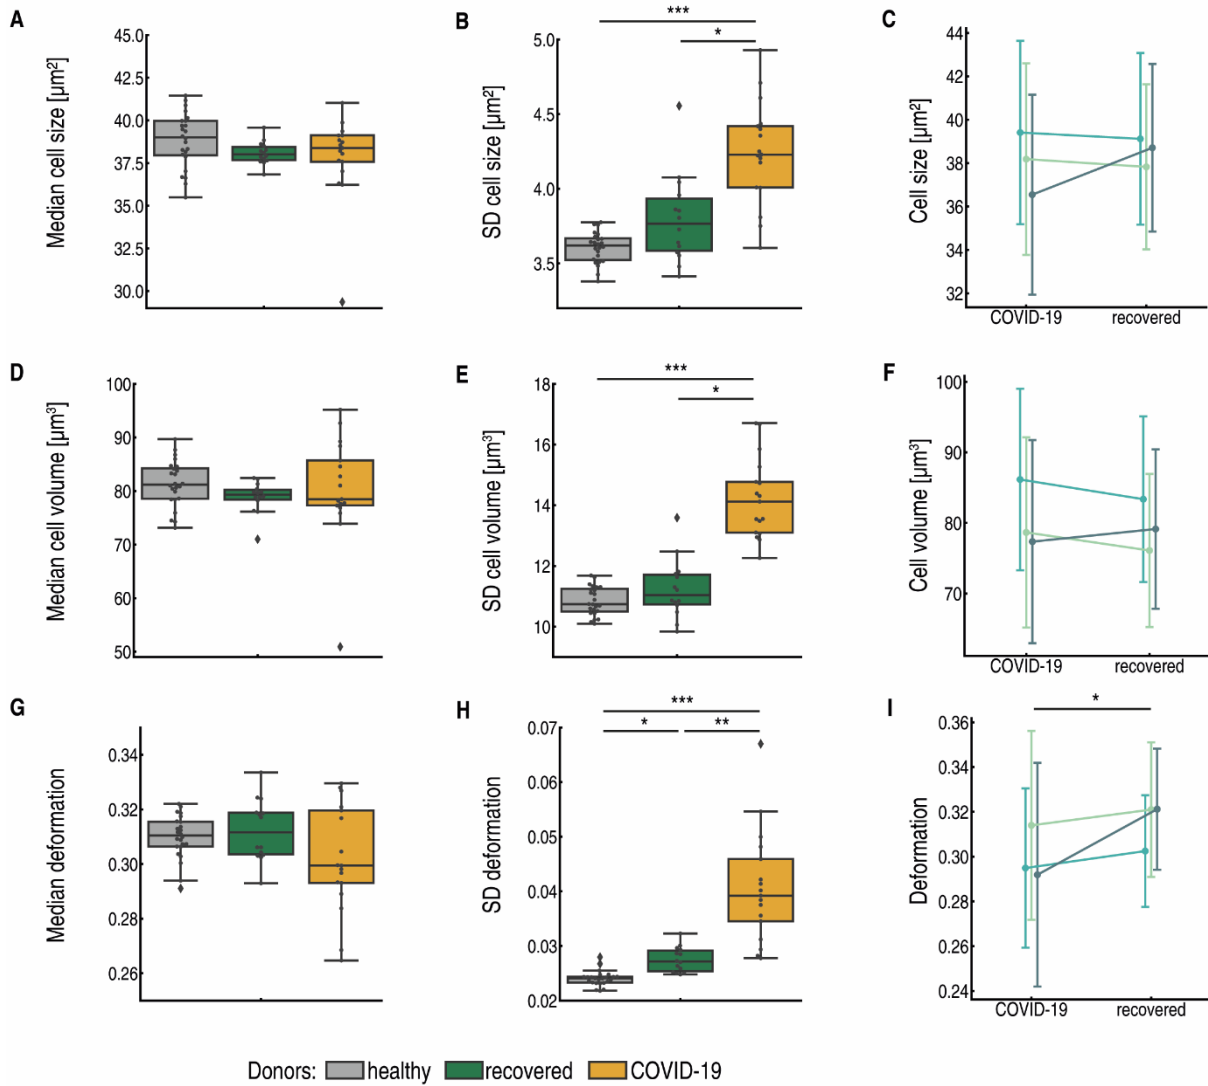

12

13 **Supplementary figure 2. Physical properties of erythrocytes of COVID-19 patients compared to**  
 14 **controls.** Quantification of A-C) cross-sectional cell area, D-F) cell volume, G-I) cell deformation; in  
 15 these graphs COVID-19 patients (yellow, n = 17) are compared to recovered donors (green, n = 14) and  
 16 healthy donors (grey, n = 24). Panels C), F), I) show three patients measured at two time points, during  
 17 COVID-19 and after recovery; circle markers represent the median value and error bars represent the  
 18 standard deviation for each patient. Statistical comparisons in C), F), I) were performed using linear  
 19 mixed model analysis. All other statistical comparisons were done using Kruskal-Wallis test with Dunn's  
 20 posthoc test. \*  $p < .05$ , \*\*  $p < .01$ , \*\*\*  $p < .001$ .

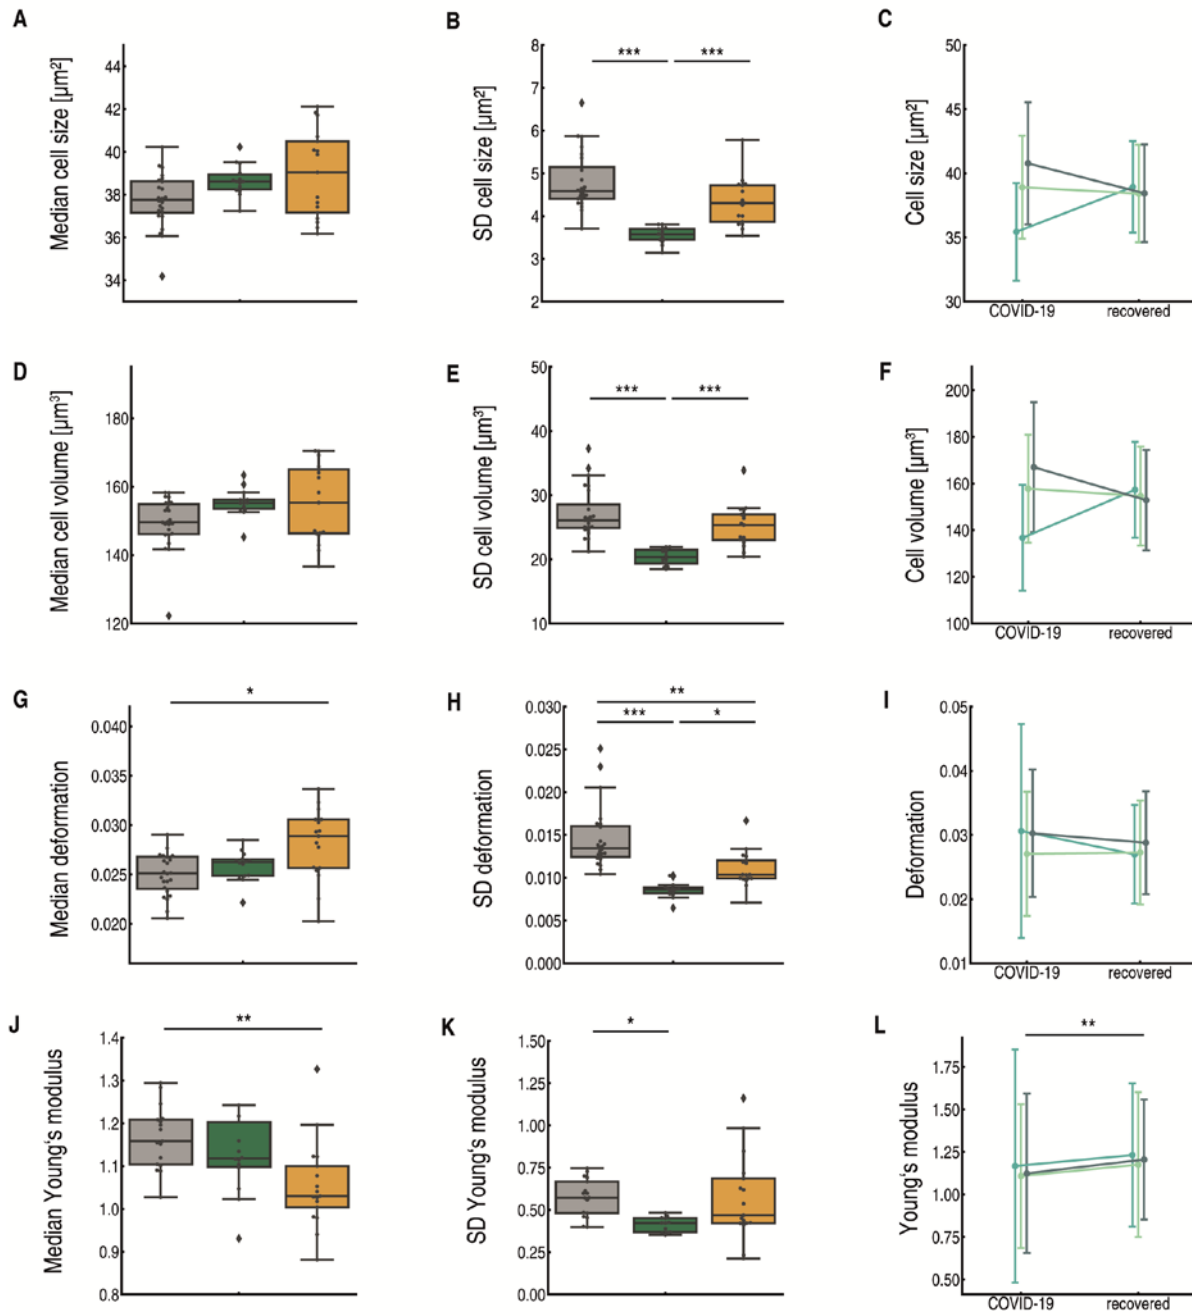

Donors: ■ healthy ■ recovered ■ COVID-19

21

22 **Supplementary figure 3. Physical properties of lymphocytes of COVID-19 patients compared to**  
 23 **controls.** Quantification of A-C) cross-sectional cell area, D-F) cell volume, G-I) cell deformation, J-L)  
 24 Young's modulus; in these graphs COVID-19 patients (yellow, n = 17) are compared to recovered  
 25 donors (green, n = 14) and healthy donors (grey, n = 24). Panels C), F), I) and L) show three patients  
 26 measured at two time points, during COVID-19 and after recovery; circle markers represent the median  
 27 value and error bars represent the standard deviation for each patient. Statistical comparisons in C),  
 28 F), I), L) were performed using linear mixed model analysis. All other statistical comparisons were done  
 29 using Kruskal-Wallis test with Dunn's posthoc test. \*  $p < .05$ , \*\*  $p < .01$ , \*\*\*  $p < .001$ .

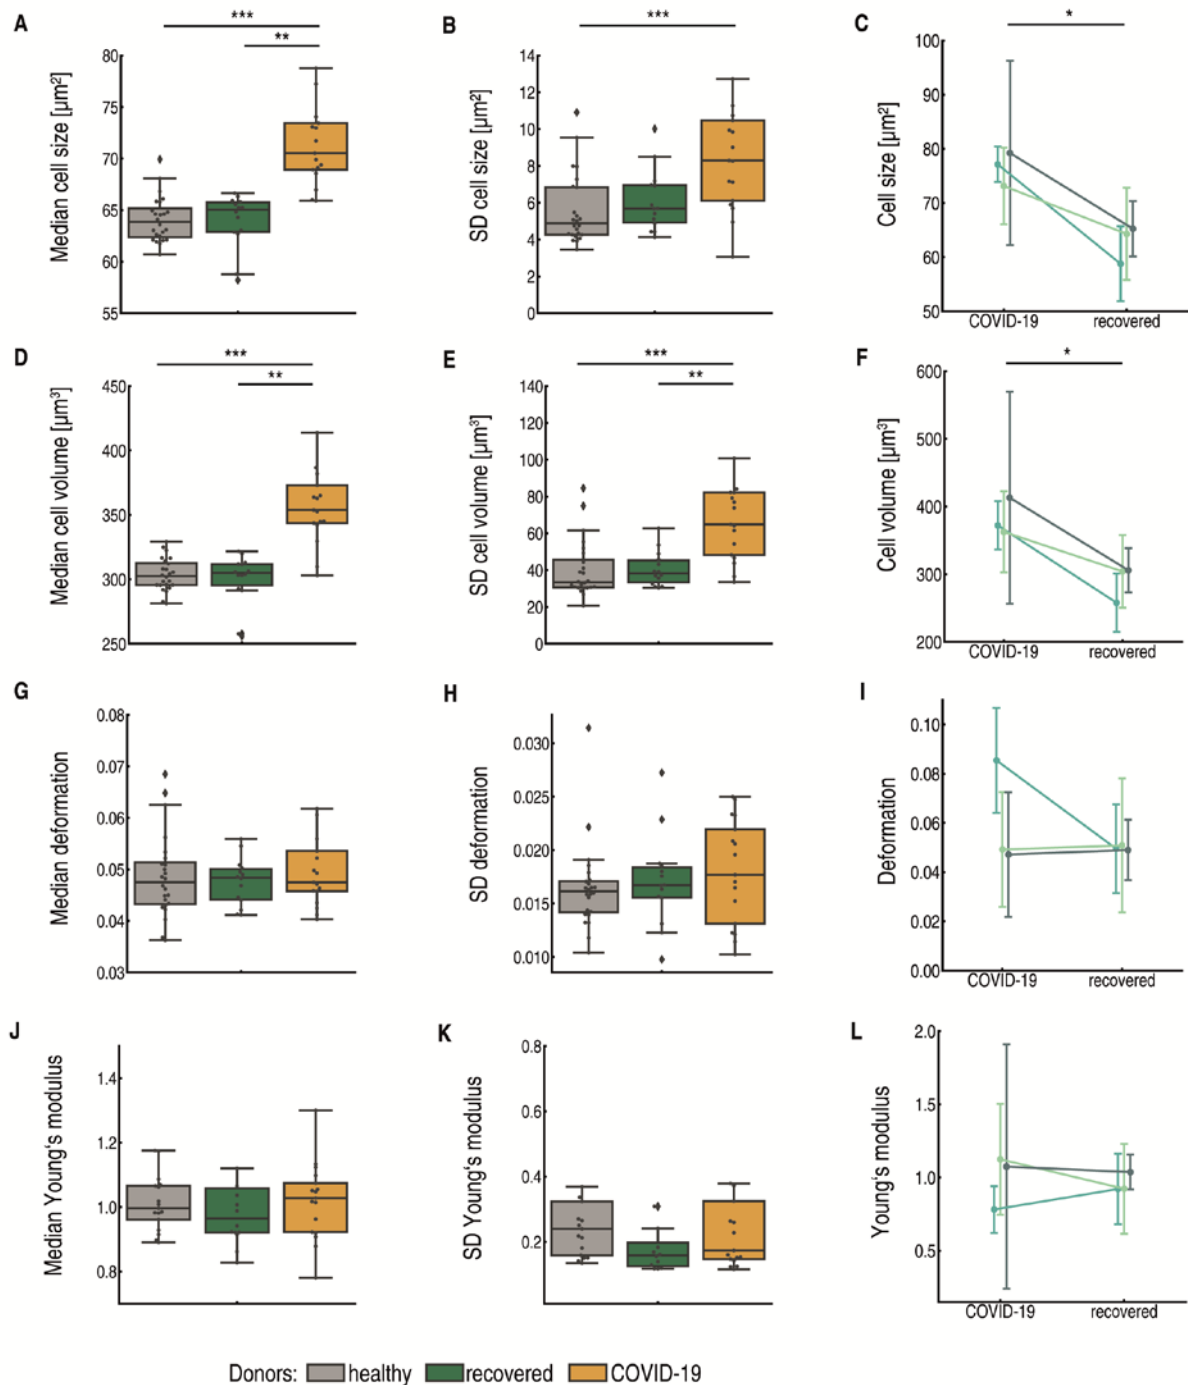

30

31 **Supplementary figure 4. Physical properties of monocytes of COVID-19 patients compared to**  
 32 **controls.** Quantification of A-C) cross-sectional cell area, D-F) cell volume, G-I) cell deformation, J-L)  
 33 Young's modulus; in these graphs COVID-19 patients (yellow, n = 17) are compared to recovered  
 34 donors (green, n = 14) and healthy donors (grey, n = 24). Panels C), F), I) and L) show three patients  
 35 measured at two time points, during COVID-19 and after recovery; circle markers represent the median  
 36 value and error bars represent the standard deviation for each patient. Statistical comparisons in C),  
 37 F), I), L) were performed using linear mixed model analysis. All other statistical comparisons were done  
 38 using Kruskal-Wallis test with Dunn's posthoc test. \*  $p < .05$ , \*\*  $p < .01$ , \*\*\*  $p < .001$ .

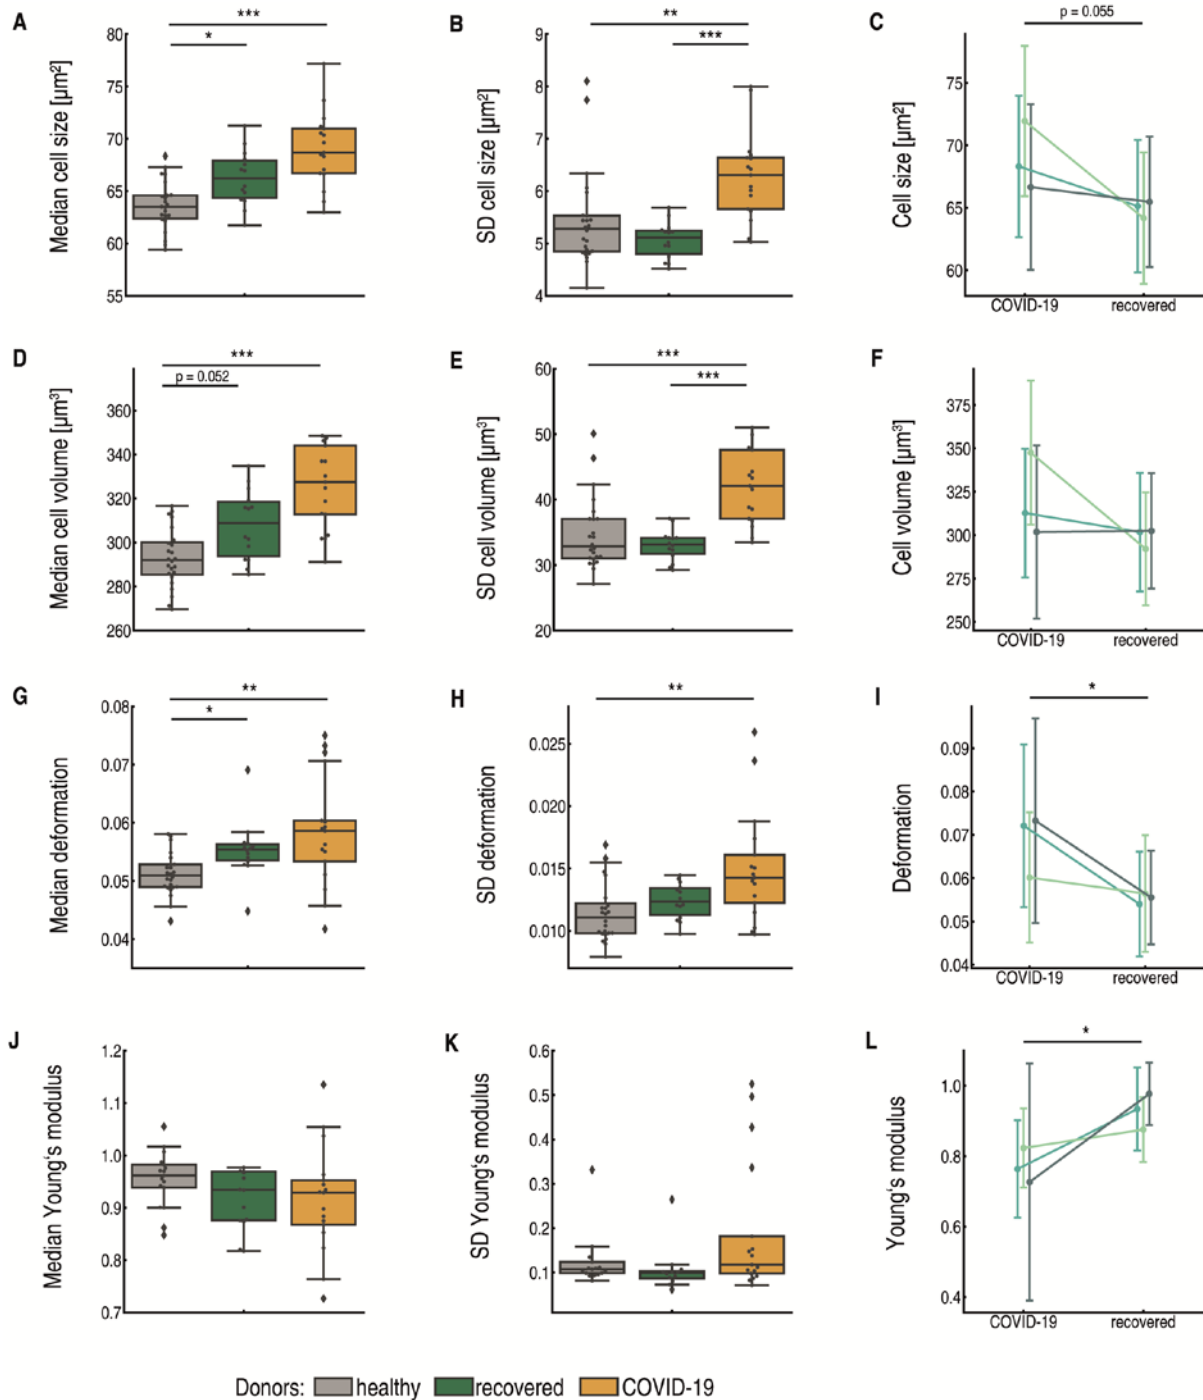

39

40 **Supplementary figure 5. Physical properties of neutrophils of COVID-19 patients compared to**  
 41 **controls.** Quantification of A-C) cross-sectional cell area, D-F) cell volume, G-I) cell deformation, J-L)  
 42 Young's modulus; in these graphs COVID-19 patients (yellow, n = 17) are compared to recovered  
 43 donors (green, n = 14) and healthy donors (grey, n = 24). Panels C), F), I) and L) show three patients  
 44 measured at two time points, during COVID-19 and after recovery; circle markers represent the median  
 45 value and error bars represent the standard deviation for each patient. Statistical comparisons in C),  
 46 F), I), L) were performed using linear mixed model analysis. All other statistical comparisons were done  
 47 using Kruskal-Wallis test with Dunn's posthoc test. \*  $p < .05$ , \*\*  $p < .01$ , \*\*\*  $p < .001$ .

48



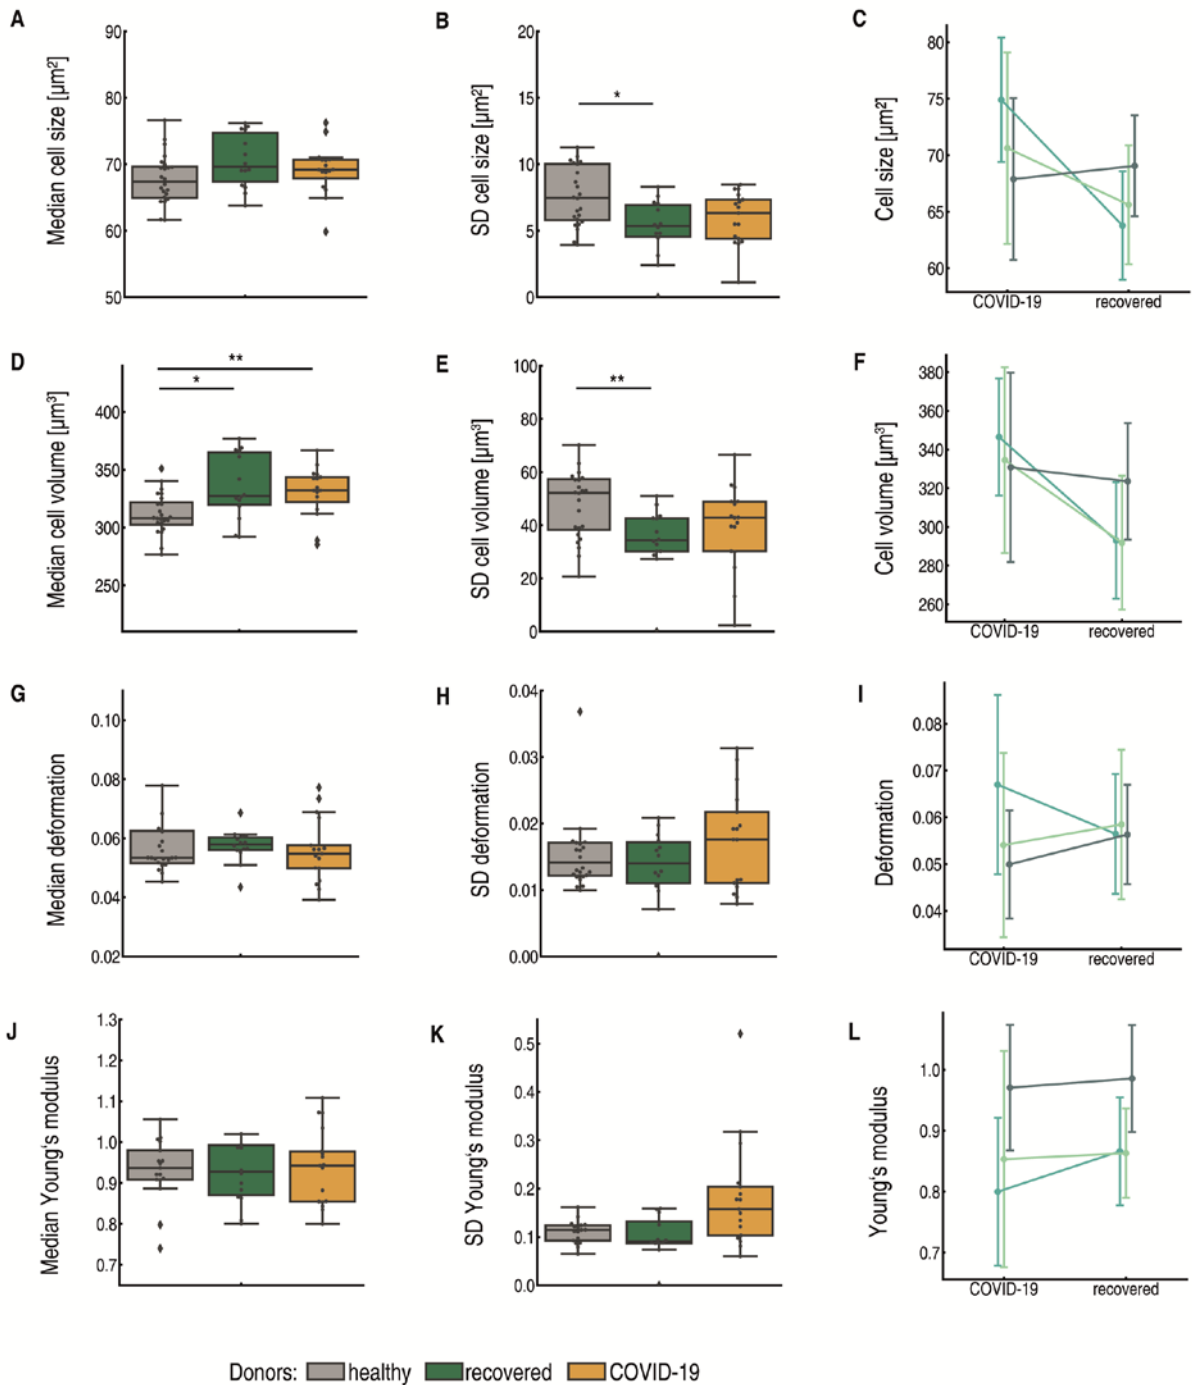

49

50 **Supplementary figure 6. Physical properties of eosinophils of COVID-19 patients compared to**  
 51 **controls.** Quantification of A-C) cross-sectional cell area, D-F) cell volume, G-I) cell deformation, J-L)  
 52 Young's modulus; in these graphs COVID-19 patients (yellow, n = 17) are compared to recovered  
 53 donors (green, n = 14) and healthy donors (grey, n = 24). Panels C), F), I) and L) show three patients  
 54 measured at two time points, during COVID-19 and after recovery; circle markers represent the median  
 55 value and error bars represent the standard deviation for each patient. Statistical comparisons in C),  
 56 F), I), L) were performed using linear mixed model analysis. All other statistical comparisons were done  
 57 using Kruskal-Wallis test with Dunn's posthoc test. \*  $p < .05$ , \*\*  $p < .01$ , \*\*\*  $p < .001$ .

58

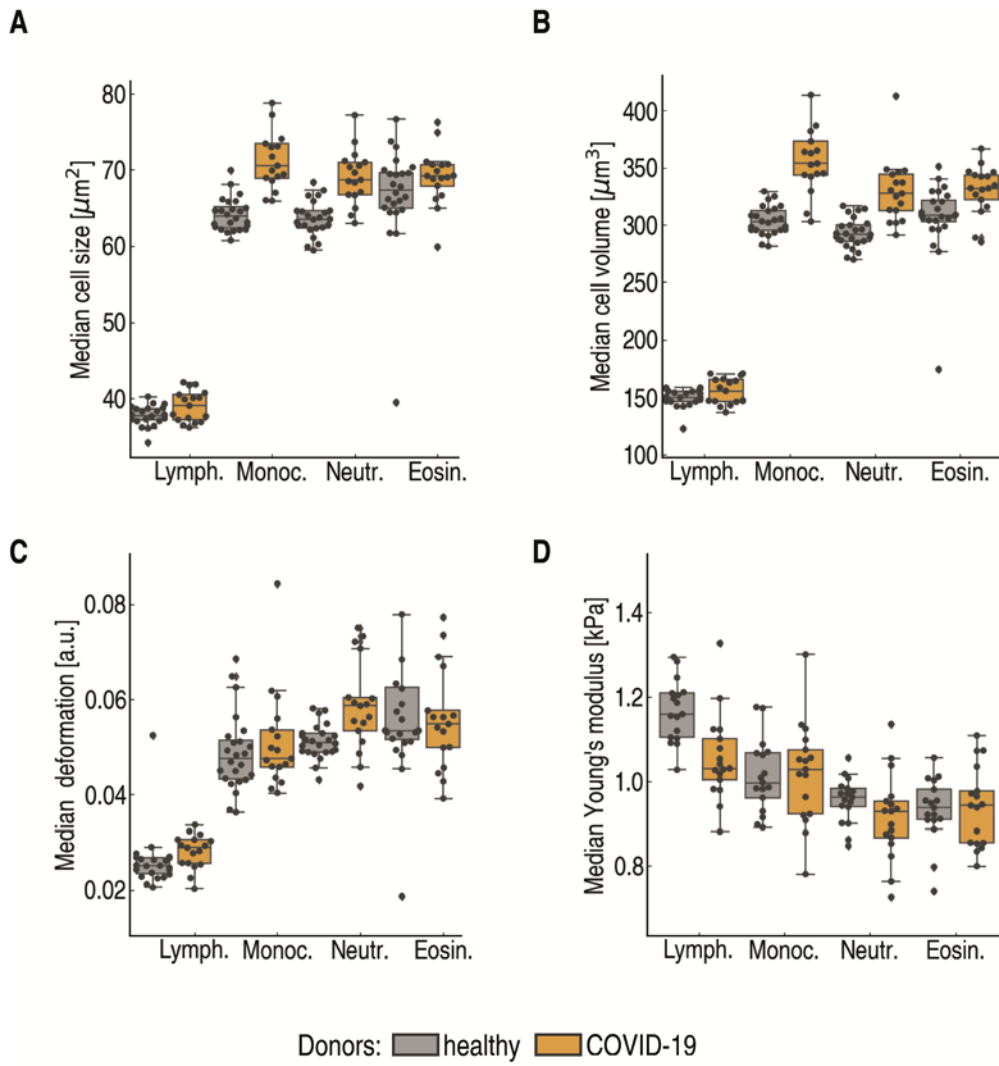

59

60 **Supplementary figure 7. A comparison of the physical properties of the four examined white blood**  
 61 **cell types in COVID-19 patients (yellow) compared to the control group (grey). A) Median cell size, B)**  
 62 **median cell volume, C) median deformation, D) median Young's modulus.**
